# Supplementary material for: Machine Learning to Calculate Heparin Dose in COVID-19 Patients with Active Cancer
Source: MDPI journal article supplement (doi:10.3390/jcm11010219), 2021-12-31
Supplement: s1 [file s1]

| Age (years) | Sex (male/female) | IMC   | D-dimer levels (pmol) | Platelet count | Fibrinogen levels | Daily dose | Oxetidine (mg/dL) | Mechanical ventilation (yes/no) | FiO2 (%) | Bilirubin (mg/dL) | Glasgow Coma Scale | Systolic blood pressure | Hypertension (yes/no) | Ischemic Heart Disease (yes/no) | ACE inhibitors (yes/no) | ARBs (yes/no) | NT-proBNP | TEV7(yes/no) |
|-------------|-------------------|-------|-----------------------|----------------|-------------------|------------|-------------------|---------------------------------|----------|-------------------|--------------------|-------------------------|-----------------------|---------------------------------|-------------------------|---------------|-----------|--------------|
| 90          | 1                 | 21.64 | 4.00                  | 207000         | 460               | 0.4        | 0.8               | 0                               | 21       | 0.64              | 13                 | 120                     | 1                     | 0                               | 0                       | 0             | 150.00    | 0            |
| 75          | 1                 | 27.34 | 1.27                  | 443000         | 381               | 1.2        | 0.8               | 0                               | 21       | 0.51              | 15                 | 120                     | 1                     | 0                               | 0                       | 1             | 1097.00   | 0            |
| 74          | 1                 | 20.03 | 1.87                  | 328000         | 401               | 0.4        | 0.4               | 0                               | 31       | 0.44              | 9                  | 115                     | 0                     | 0                               | 0                       | 0             | 308.00    | 1            |
| 74          | 0                 | 20.28 | 1.94                  | 270000         | 850               | 0.8        | 1.2               | 0                               | 60       | 0.29              | 10                 | 130                     | 1                     | 0                               | 1                       | 0             | 853.00    | 1            |
| 81          | 0                 | 25.95 | 1.66                  | 214000         | 498               | 0.3        | 1.7               | 0                               | 21       | 0.27              | 15                 | 115                     | 1                     | 0                               | 0                       | 1             | 5863.00   | 0            |
| 62          | 1                 | 24.22 | 0.36                  | 230000         | 675               | 0.6        | 0.5               | 0                               | 21       | 0.24              | 10                 | 110                     | 1                     | 0                               | 0                       | 0             | 159.00    | 0            |
| 65          | 0                 | 16.53 | 0.38                  | 200000         | 340               | 0.8        | 0.8               | 0                               | 21       | 0.26              | 13                 | 115                     | 0                     | 0                               | 0                       | 0             | 188.00    | 0            |
| 76          | 0                 | 25.39 | 0.27                  | 239000         | 418               | 0.4        | 1                 | 0                               | 21       | 0.48              | 15                 | 115                     | 0                     | 0                               | 0                       | 0             | 4159.00   | 0            |
| 59          | 0                 | 27.34 | 0.48                  | 155000         | 427               | 0.4        | 0.8               | 0                               | 21       | 0.35              | 15                 | 130                     | 0                     | 0                               | 0                       | 0             | 18.00     | 0            |
| 49          | 0                 | 19.59 | 0.27                  | 149000         | 152               | 0.4        | 1                 | 0                               | 21       | 0.94              | 15                 | 125                     | 0                     | 0                               | 0                       | 0             | 37.00     | 0            |
| 84          | 1                 | 27.34 | 1.17                  | 140000         | 633               | 0.4        | 0.9               | 0                               | 28       | 0.35              | 15                 | 120                     | 0                     | 0                               | 0                       | 0             | 321.00    | 0            |
| 81          | 1                 | 22.04 | 1.01                  | 264000         | 388               | 0.6        | 1.7               | 0                               | 24       | 0.48              | 12                 | 120                     | 1                     | 1                               | 1                       | 0             | 2102.00   | 0            |
| 39          | 0                 | 20.98 | 0.51                  | 178000         | 594               | 0.4        | 0.4               | 1                               | 24       | 0.80              | 15                 | 120                     | 0                     | 0                               | 0                       | 0             | 25.00     | 0            |
| 91          | 1                 | 21.48 | 0.48                  | 141000         | 351               | 0.4        | 2.3               | 1                               | 28       | 0.75              | 15                 | 160                     | 1                     | 0                               | 0                       | 1             | 33873.00  | 1            |
| 55          | 0                 | 0.27  | 130000                | 574            | 0.5               | 0.3        | 0                 | 21                              | 0.47     | 13                | 110                | 1                       | 0                     | 1                               | 0                       | 1             | 43.00     | 1            |
| 61          | 0                 | 0.67  | 118000                | 575            | 0.4               | 1          | 1                 | 1                               | 21       | 0.55              | 15                 | 130                     | 0                     | 0                               | 0                       | 0             | 159.00    | 0            |
| 79          | 0                 | 4     | 109000                | 632            | 0.2               | 1.2        | 1                 | 0                               | 60       | 0.67              | 13                 | 120                     | 1                     | 0                               | 0                       | 1             | 697.00    | 0            |
| 69          | 0                 | 19.15 | 1.18                  | 172000         | 584               | 0.8        | 0.5               | 0                               | 21       | 0.90              | 10                 | 145                     | 1                     | 0                               | 1                       | 0             | 333.00    | 0            |
| 85          | 1                 | 1.74  | 272000                | 691            | 0.4               | 0.5        | 0                 | 35                              | 0.27     | 11                | 120                | 0                       | 0                     | 0                               | 0                       | 0             | 1715.00   | 1            |
| 83          | 0                 | 18.29 | 0.27                  | 239000         | 278               | 0.4        | 0.7               | 0                               | 21       | 0.58              | 15                 | 120                     | 1                     | 0                               | 0                       | 1             | 599.00    | 0            |
| 67          | 1                 | 29.14 | 0.31                  | 212000         | 445               | 0.4        | 0.8               | 0                               | 21       | 0.36              | 15                 | 100                     | 0                     | 0                               | 0                       | 0             | 391.00    | 0            |
| 55          | 0                 | 21.60 | 0.39                  | 243000         | 385               | 0.8        | 1.1               | 0                               | 21       | 0.40              | 15                 | 120                     | 0                     | 0                               | 0                       | 0             | 27.00     | 1            |
| 84          | 1                 | 24.22 | 0.60                  | 137000         | 551               | 0.5        | 0.7               | 0                               | 21       | 0.37              | 15                 | 135                     | 1                     | 0                               | 0                       | 1             | 151.00    | 0            |
| 89          | 0                 | 25.71 | 0.95                  | 165000         | 524               | 0.4        | 1.5               | 0                               | 21       | 0.27              | 15                 | 130                     | 1                     | 1                               | 1                       | 0             | 1543.00   | 0            |
| 87          | 1                 | 27.34 | 0.8                   | 302000         | 246               | 3.1        | 0.8               | 1                               | 21       | 0.92              | 6                  | 130                     | 1                     | 0                               | 0                       | 0             | 4907.00   | 1            |
| 72          | 1                 | 22.49 | 4                     | 360000         | 502               | 0.4        | 0.9               | 0                               | 28       | 0.59              | 14                 | 150                     | 0                     | 1                               | 0                       | 0             | 1160.00   | 0            |
| 18          | 1                 | 16.65 | 0.27                  | 154000         | 327               | 0.4        | 0.4               | 0                               | 21       | 0.70              | 15                 | 100                     | 0                     | 0                               | 0                       | 0             | 59.00     | 0            |
| 58          | 1                 | 21.40 | 2.22                  | 303000         | 566               | 0.5        | 0.6               | 0                               | 24       | 0.19              | 6                  | 90                      | 0                     | 0                               | 0                       | 0             | 346.00    | 0            |
| 75          | 1                 | 4     | 225000                | 327            | 0.4               | 0.8        | 0                 | 21                              | 0.49     | 15                | 130                | 1                       | 0                     | 0                               | 0                       | 0             | 156.00    | 0            |
| 50          | 0                 | 26.12 | 1.78                  | 400000         | 709               | 0.4        | 0.8               | 0                               | 35       | 0.62              | 15                 | 110                     | 0                     | 0                               | 0                       | 0             | 34.00     | 0            |
| 55          | 0                 | 25.71 | 0.44                  | 170000         | 577               | 0.4        | 0.7               | 0                               | 21       | 0.36              | 15                 | 115                     | 0                     | 0                               | 0                       | 0             | 17.00     | 0            |
| 74          | 1                 | 4     | 109000                | 450            | 1.9               | 0.4        | 1                 | 0                               | 40       | 1.31              | 3                  | 100                     | 1                     | 0                               | 0                       | 0             | 1419.00   | 0            |
| 73          | 1                 | 25.39 | 0.34                  | 186000         | 481               | 0.4        | 0.6               | 0                               | 21       | 0.49              | 15                 | 150                     | 1                     | 0                               | 1                       | 0             | 82.00     | 0            |
| 79          | 0                 | 4     | 158000                | 789            | 0.4               | 1.5        | 0                 | 60                              | 0.69     | 8                 | 145                | 0                       | 0                     | 0                               | 0                       | 0             | 2833.00   | 1            |
| 74          | 0                 | 21.60 | 0.62                  | 132000         | 245               | 0.4        | 0.8               | 0                               | 21       | 0.25              | 15                 | 130                     | 1                     | 0                               | 0                       | 1             | 221.00    | 0            |
| 86          | 1                 | 0.93  | 162000                | 168            | 1.5               | 0          | 1.5               | 0                               | 68       | 0.56              | 13                 | 140                     | 1                     | 0                               | 0                       | 1             | 900.00    | 1            |
| 43          | 1                 | 33.30 | 4                     | 167000         | 526               | 0.4        | 0.7               | 0                               | 21       | 0.21              | 10                 | 150                     | 1                     | 0                               | 0                       | 0             | 11.00     | 0            |
| 89          | 0                 | 23.44 | 1.24                  | 176000         | 520               | 0.4        | 2                 | 0                               | 21       | 0.34              | 12                 | 110                     | 1                     | 0                               | 0                       | 1             | 5890.00   | 0            |
| 35          | 0                 | 27.68 | 0.53                  | 162000         | 700               | 0.4        | 0.9               | 0                               | 21       | 0.72              | 15                 | 115                     | 0                     | 1                               | 0                       | 0             | 96.00     | 0            |
| 53          | 1                 | 20.00 | 0.32                  | 222000         | 713               | 0.4        | 0.3               | 0                               | 21       | 0.21              | 13                 | 140                     | 1                     | 0                               | 0                       | 0             | 81.00     | 0            |
| 51          | 0                 | 25.47 | 0.30                  | 158000         | 689               | 0.4        | 0.9               | 0                               | 24       | 0.54              | 15                 | 115                     | 1                     | 0                               | 1                       | 0             | 99.00     | 0            |
| 81          | 1                 | 25.71 | 3.15                  | 378000         | 296               | 0.4        | 0.5               | 0                               | 24       | 0.51              | 9                  | 140                     | 1                     | 0                               | 0                       | 1             | 4852.00   | 1            |
| 63          | 1                 | 1.15  | 317000                | 779            | 0.4               | 0.4        | 1                 | 1                               | 21       | 0.34              | 9                  | 110                     | 0                     | 0                               | 0                       | 0             | 173.00    | 0            |
| 100         | 1                 | 24.17 | 1.14                  | 225000         | 686               | 0.2        | 0.9               | 0                               | 21       | 0.47              | 15                 | 130                     | 0                     | 1                               | 0                       | 0             | 957.00    | 0            |
| 86          | 0                 | 22.09 | 1.31                  | 143000         | 331               | 0.4        | 0.7               | 0                               | 28       | 0.24              | 15                 | 100                     | 1                     | 0                               | 0                       | 1             | 208.00    | 0            |
| 51          | 1                 | 22.31 | 0.65                  | 141000         | 397               | 0.4        | 0.5               | 0                               | 21       | 0.89              | 15                 | 90                      | 0                     | 0                               | 0                       | 0             | 122.00    | 0            |
| 68          | 1                 | 26.67 | 0.39                  | 379000         | 425               | 0.4        | 0.6               | 0                               | 21       | 0.30              | 10                 | 115                     | 0                     | 0                               | 0                       | 0             | 50.00     | 0            |
| 66          | 1                 | 24.97 | 0.27                  | 171000         | 319               | 0.4        | 0.4               | 0                               | 21       | 0.34              | 15                 | 110                     | 1                     | 0                               | 0                       | 0             | 75.00     | 0            |
| 87          | 1                 | 22.66 | 0.56                  | 155000         | 429               | 0.8        | 1.9               | 0                               | 21       | 0.16              | 15                 | 115                     | 0                     | 1                               | 0                       | 0             | 1402.00   | 0            |
| 95          | 1                 | 23.78 | 1.05                  | 182000         | 460               | 0.4        | 1.2               | 0                               | 35       | 0.54              | 13                 | 130                     | 0                     | 0                               | 0                       | 0             | 14228.00  | 1            |
| 39          | 0                 | 19.53 | 0.27                  | 170000         | 420               | 0.4        | 0.6               | 0                               | 21       | 0.31              | 12                 | 120                     | 0                     | 0                               | 0                       | 0             | 40.00     | 0            |
| 58          | 0                 | 1.66  | 354000                | 856            | 0.4               | 0.51       | 0                 | 60                              | 0.80     | 15                | 150                | 1                       | 0                     | 0                               | 0                       | 0             | 117.00    | 0            |
| 57          | 0                 | 22.86 | 2.27                  | 150000         | 476               | 0.4        | 1.1               | 0                               | 21       | 0.76              | 15                 | 120                     | 0                     | 0                               | 0                       | 0             | 524.00    | 0            |
| 78          | 1                 | 20.81 | 0.72                  | 186000         | 496               | 0.3        | 0.5               | 0                               | 21       | 0.36              | 11                 | 110                     | 0                     | 0                               | 0                       | 0             | 213.00    | 1            |
| 91          | 0                 | 17.72 | 0.82                  | 133000         | 715               | 1.5        | 0.4               | 0                               | 21       | 0.16              | 15                 | 178                     | 0                     | 0                               | 0                       | 0             | 2179.00   | 0            |
| 76          | 1                 | 21.48 | 0.35                  | 225000         | 380               | 0.4        | 0.7               | 0                               | 21       | 0.24              | 15                 | 140                     | 1                     | 0                               | 0                       | 1             | 439.00    | 0            |
| 67          | 0                 | 2.56  | 153000                | 527            | 0.4               | 0.8        | 0                 | 21                              | 0.38     | 15                | 130                | 0                       | 0                     | 0                               | 0                       | 0             | 199.00    | 0            |
| 37          | 0                 | 25.71 | 1.51                  | 212000         | 425               | 0.4        | 0.9               | 0                               | 21       | 0.29              | 15                 | 130                     | 0                     | 0                               | 0                       | 0             | 33.00     | 0            |
| 89          | 0                 | 1.45  | 172000                | 380            | 1.2               | 0.8        | 1                 | 0                               | 28       | 0.74              | 12                 | 155                     | 1                     | 1                               | 1                       | 0             | 301.00    | 0            |
| 87          | 1                 | 4     | 191000                | 405            | 0.4               | 1.9        | 0                 | 21                              | 0.30     | 9                 | 68                 | 0                       | 0                     | 0                               | 0                       | 0             | 14600.00  | 1            |
| 65          | 0                 | 4     | 405000                | 991            | 0.8               | 0.9        | 1                 | 60                              | 0.72     | 10                | 110                | 1                       | 1                     | 0                               | 1                       | 0             | 571.00    | 1            |
| 61          | 1                 | 22.89 | 0.70                  | 183000         | 595               | 0.4        | 1.1               | 0                               | 21       | 0.26              | 15                 | 130                     | 1                     | 0                               | 1                       | 0             | 75.00     | 0            |
| 86          | 0                 | 22.22 | 0.77                  | 222000         | 379               | 0.4        | 0.8               | 0                               | 21       | 0.75              | 15                 | 100                     | 0                     | 0                               | 0                       | 0             | 642.00    | 0            |
| 83          | 1                 | 31.25 | 0.67                  | 163000         | 584               | 0.5        | 0.7               | 0                               | 50       | 0.50              | 15                 | 100                     | 1                     | 0                               | 0                       | 0             | 389.00    | 1            |
| 82          | 0                 | 4     | 119000                | 380            | 0.4               | 1.4        | 0                 | 31                              | 1.25     | 15                | 120                | 1                       | 0                     | 0                               | 1                       | 0             | 192.00    | 0            |
| 71          | 1                 | 22.49 | 1.76                  | 354000         | 569               | 0.4        | 0.7               | 0                               | 24       | 0.58              | 15                 | 140                     | 1                     | 0                               | 0                       | 1             | 81.00     | 0            |
| 87          | 1                 | 25.10 | 0.59                  | 267000         | 271               | 0.4        | 1.1               | 0                               | 21       | 0.25              | 15                 | 110                     | 1                     | 1                               | 0                       | 0             | 469.00    | 0            |
| 62          | 0                 | 27.68 | 0.85                  | 235000         | 619               | 0.4        | 3.1               | 0                               | 21       | 0.24              | 15                 | 110                     | 0                     | 1                               | 0                       | 0             | 328.00    | 0            |
| 73          | 0                 | 0.78  | 202000                | 470            | 0.4               | 2.9        | 0                 | 21                              | 0.35     | 15                | 130                | 1                       | 1                     | 0                               | 0                       | 1             | 4135.00   | 1            |
| 85          | 0                 | 20.48 | 0.46                  | 182000         | 539               | 0.4        | 2.6               | 0                               | 21       | 0.45              | 15                 | 115                     | 1                     | 0                               | 0                       | 1             | 493.00    | 0            |
| 52          | 1                 | 22.22 | 0.57                  | 180000         | 643               | 0.4        | 0.6               | 0                               | 21       | 0.64              | 15                 | 110                     | 1                     | 0                               | 0                       | 0             | 118.00    | 0            |
| 42          | 1                 | 2.11  | 190000                | 553            | 0.5               | 0.6        | 0                 | 21                              | 1.03     | 12                | 130                | 0                       | 0                     | 0                               | 0                       | 0             | 36.00     | 0            |
| 57          | 0                 | 25.71 | 0.29                  | 194000         | 419               | 0.4        | 0.8               | 0                               | 21       | 0.55              | 15                 | 110                     | 1                     | 0                               | 1                       | 0             | 32.00     | 0            |
| 57          | 1                 | 0.27  | 249000                | 262            | 0.4               | 1.4        | 0                 | 21                              | 0.52     | 15                | 125                | 0                       | 0                     | 0                               | 0                       | 0             | 57.00     | 0            |
| 89          | 1                 | 4     | 240000                | 400            | 1.4               | 0.4        | 1                 | 0                               | 60       | 0.26              | 14                 | 150                     | 1                     | 0                               | 0                       | 0             | 5037.00   | 0            |
| 92          | 1                 | 26.57 | 4.00                  | 355000         | 659               | 0.8        | 1.4               | 0                               | 60       | 0.66              | 12                 | 150                     | 1                     | 0                               | 0                       | 1             | 5803.00   | 1            |
| 54          | 1                 | 29.38 | 0.70                  | 280000         | 570               | 0.4        | 0.5               | 0                               | 21       | 0.51              | 15                 | 140                     | 0                     | 0                               | 0                       | 0             | 31.00     | 0            |
| 88          | 1                 | 21.08 | 0.74                  | 181000         | 441               | 0.4        | 0.4               | 0                               | 21       | 0.35              | 15                 | 135                     | 0                     | 0                               | 0                       | 0             | 210.00    | 0            |
| 81          | 1                 | 1.63  | 171000                | 503            | 0.4               | 0.7        | 0                 | 21                              | 0.58     | 15                | 130                | 0                       | 0                     | 0                               | 0                       | 0             | 151.00    | 0            |
| 83          | 0                 | 23.23 | 1.22                  | 247000         | 631               | 0.8        | 1.6               | 0                               | 21       | 0.56              | 15                 | 140                     | 1                     | 0                               | 0                       | 0             | 5208.00   | 0            |
| 70          | 1                 | 24.44 | 0.46                  | 177000         | 435               | 0.4        | 0.6               | 0                               | 21       | 0.38              | 15                 | 140                     | 1                     | 0                               | 0                       | 1             | 66.00     | 0            |
| 90          | 0                 | 22.20 | 0.173                 | 87000          | 527               | 0.3        | 2.8               | 0                               | 21       | 0.53              | 8                  | 140                     | 1                     | 0                               | 0                       | 0             | 2760.00   |              |

**Supplementary Table S1.** List of 36 variables, full model. DOB = Date of birth, BMI = Body Mass Index, DVT = Deep Vein Thrombosis, CUS = Compression Ultrasonography, PE = Pulmonary Embolism, ARBs = Angiotensin Receptors Blockers, HF = Heart Failure.

|    |                                 |
|----|---------------------------------|
| 1. | Patient's number-ID             |
| 2  | DOB                             |
| 3  | Age (years)                     |
| 4  | Sex (male/female)               |
| 5  | Date admission in hospital      |
| 6  | In the ICU (yes/no)             |
| 7  | Date diagnosis COVID            |
| 8  | Weight (Kg)                     |
| 9  | Altezza (cm)                    |
| 10 | BMI                             |
| 11 | D-dimer Levels (peak)           |
| 12 | Platelet count                  |
| 13 | Fibrinogen levels               |
| 14 | PT (in seconds)                 |
| 15 | INR                             |
| 16 | DVT signs (yes/no)              |
| 17 | Bilateral CUS (yes/no)          |
| 18 | DVT? (yes/no)                   |
| 19 | DVT Territory or PE             |
| 20 | CT scan                         |
| 21 | Drug for thromboprophylaxis     |
| 22 | Daily dose (mg)                 |
| 23 | Creatinine (mg/dL)              |
| 24 | Mechanical ventilation (yes/no) |
| 25 | PaO <sub>2</sub> (mmHg)         |
| 26 | FiO <sub>2</sub> (%)            |
| 27 | Bilirubin (mg/dl)               |
| 28 | Glasgow Coma Scale              |
| 29 | Systolic blood pressure         |
| 30 | Hypertension (yes/no)           |
| 31 | Ischemic heart disease (yes/no) |
| 32 | Ace inhibitors (yes/no)         |
| 33 | ARBs (yes/no)                   |
| 34 | HF (yes/no)                     |
| 35 | NYHA (class)                    |
| 36 | NT-proBNP                       |

**Supplementary Table S2.** List of 19 variables, reduced model. ARBs = Angiotensin Receptor Blockers, VTE = Venous Thromboembolism.

|    |                                 |
|----|---------------------------------|
| 1. | Age (years)                     |
| 2  | Sex (male/female)               |
| 3  | BMI                             |
| 4  | D-dimer Levels (peak)           |
| 5  | Platelet count                  |
| 6  | Fibrinogen levels               |
| 7  | Daily dose (mg)                 |
| 8  | Creatinine (mg/dL)              |
| 9  | Mechanical ventilation (yes/no) |
| 10 | FiO2 (%)                        |
| 11 | Bilirubin (mg/dl)               |
| 12 | Glasgow Coma Scale              |
| 13 | Systolic blood pressure         |
| 14 | Hypertension (yes/no)           |
| 15 | Ischemic heart disease (yes/no) |
| 16 | Ace inhibitors (yes/no)         |
| 17 | ARBs (yes/no)                   |
| 18 | NT-proBNP                       |
| 19 | VTE (yes/no)                    |

Precision/Sensitivity:  $Se = \frac{Tp}{Tp+Fp}$

Recall:  $Re = \frac{Tp}{Tp+Fn}$

F1-score:  $F1score = 2 \times \frac{Recall \times Precision}{Recall + Precision}$

Accuracy:  $Accuracy = \frac{Tp+Tn}{Tp+Tn+Fp+Fn}$

**Supplementary Figure S2. Equations used to measure the performance.** Tp is the number of true positive samples, Tn the number of true negative samples, Fn the number of false negative samples and Fp is the number of false positive samples.

**Supplementary Table S3. Metrics used to measure the performance.** Metrics to measure performance, three types of metrics were used: Precision, Recall and F1-Score.

|              | Precision | Recall | F1-score | Support |
|--------------|-----------|--------|----------|---------|
| 0            | 0.81      | 1.00   | 0.89     | 29      |
| 1            | 1.00      | 0.30   | 0.46     | 10      |
| Accuracy     |           |        | 0.32     | 39      |
| Macro avg    | 0.90      | 0.65   | 0.68     | 39      |
| Weighted avg | 0.86      | 0.82   | 0.79     | 39      |
